# Supplementary material for: Serotonin receptors and suicide, major depression, alcohol use disorder and reported early life adversity
Source: PubMed Central journal article supplement (PMC6294796; doi:10.1038/s41398-018-0309-1), 2018-12-14
Supplement: 41398_2018_309_MOESM2_ESM.pdf [file 41398_2018_309_MOESM2_ESM.pdf]

Suicide

Major Depressive Disorder

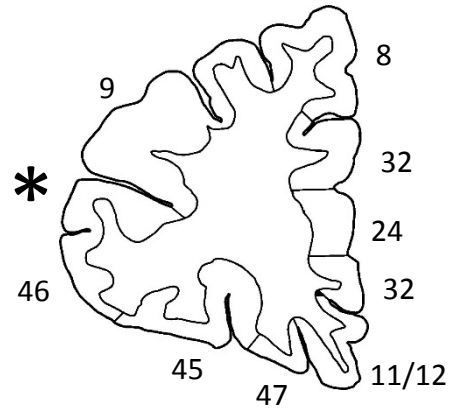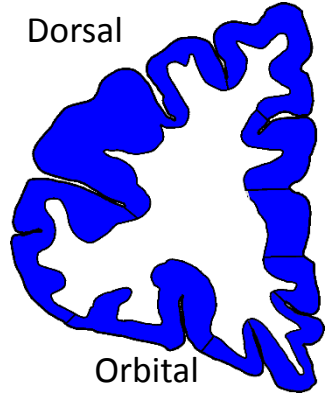

SERT

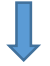

Medial

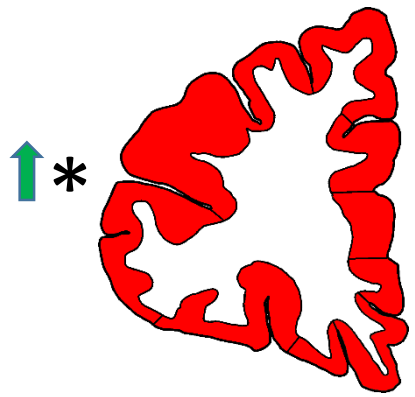

5-HT<sub>1A</sub>

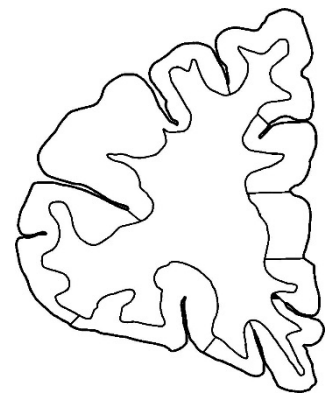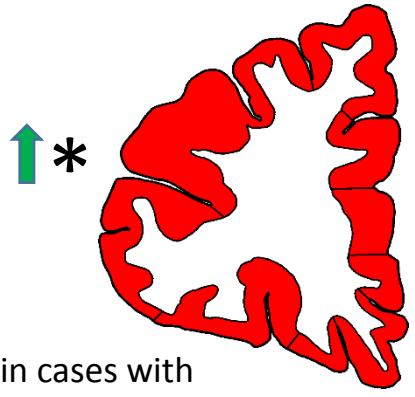

5-HT<sub>2A</sub>

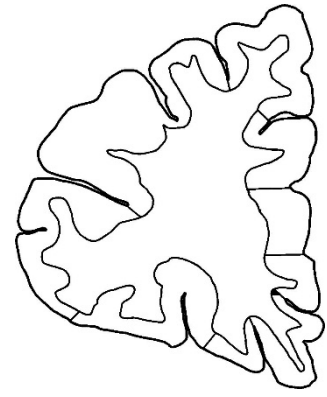

\* only in cases with psychological autopsy
