# Supplementary material for: Serotonin receptors and suicide, major depression, alcohol use disorder and reported early life adversity
Source: PubMed Central journal article supplement (PMC6294796; doi:10.1038/s41398-018-0309-1), 2018-12-14
Supplement: 41398_2018_309_MOESM3_ESM.pdf [file 41398_2018_309_MOESM3_ESM.pdf]

EFFECT OF ALCOHOL

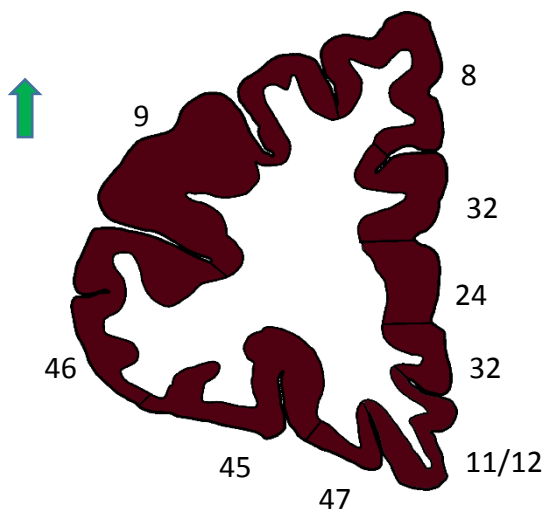

SERT

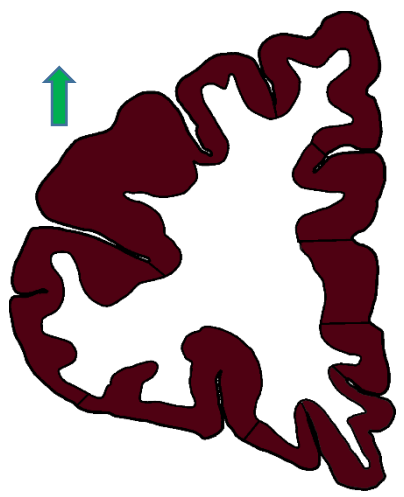

5-HT<sub>1A</sub>

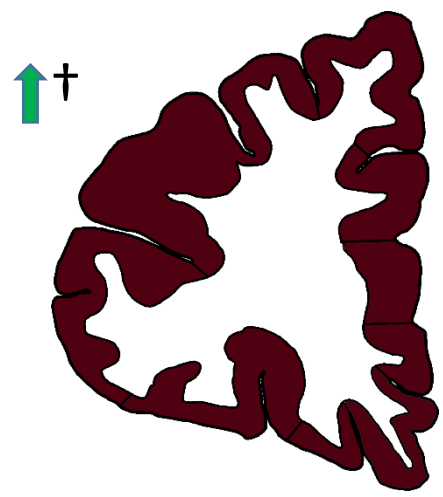

5-HT<sub>2A</sub>

EFFECT OF ADVERSITY

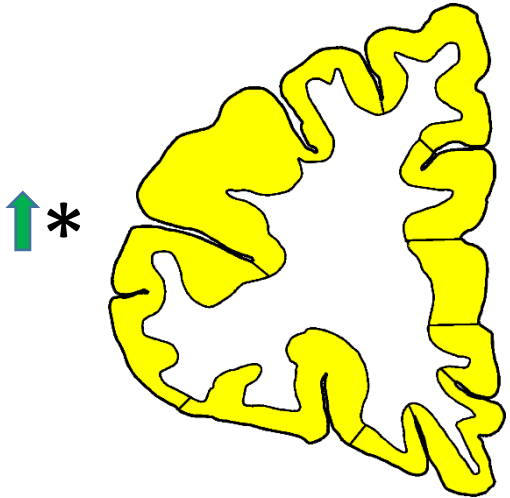

\* only in nonsuicides

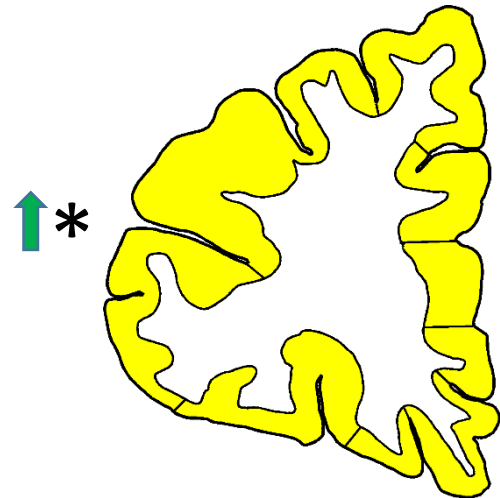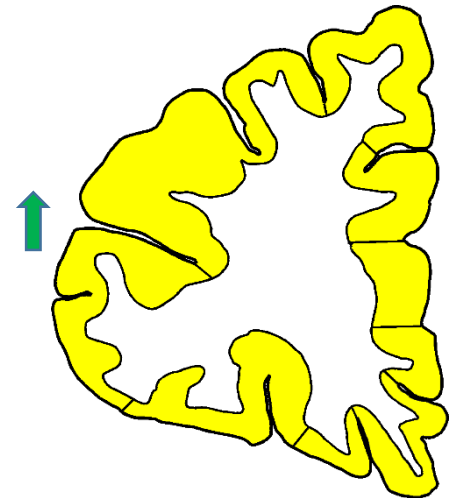

† only in suicides
